# Supplementary material for: The antagonistic mechanism of Bacillus velezensis ZW10 against rice blast disease: Evaluation of ZW10 as a potential biopesticide
Source: PubMed Central journal article supplement (PMC8396770; doi:10.1371/journal.pone.0256807), 2021-08-27
Supplement: pone.0256807.s002.pdf [file pone.0256807.s002.pdf]

| Germination rate /% |        |        |        |             |             |
|---------------------|--------|--------|--------|-------------|-------------|
| water               | Test 1 | Test 2 | Test 3 | Average     | SD          |
| 2h                  | 86.61  | 88.1   | 91.43  | 88.71333333 | 2.014982768 |
| 8h                  | 97.37  | 98.26  | 98.25  | 97.96       | 0.417212975 |
| 12h                 | 98.68  | 96.27  | 95.87  | 96.94       | 1.241155376 |
| 24h                 | 95.92  | 97.78  | 99.16  | 97.62       | 1.327554142 |
| 48h                 | 100    | 96.9   | 95.9   | 97.6        | 1.745470328 |
| 0.1% CFB            | Test 1 | Test 2 | Test 3 | Average     | SD          |
| 2h                  | 5.1    | 2.02   | 4.5    | 3.873333333 | 1.333199993 |
| 8h                  | 96.36  | 92.71  | 89.63  | 92.9        | 2.750793825 |
| 12h                 | 92.06  | 94.01  | 91     | 92.35666667 | 1.246604277 |
| 24h                 | 92.38  | 97.27  | 94.35  | 94.66666667 | 2.00885263  |
| 48h                 | 94.12  | 96.75  | 93.26  | 94.71       | 1.484609938 |

| Formination rate /% |        |        |        |             |             |
|---------------------|--------|--------|--------|-------------|-------------|
| water               | Test 1 | Test 2 | Test 3 | Average     | SD          |
| 2h                  | 0      | 0      | 0      | 0           | 0           |
| 8h                  | 85.09  | 86.96  | 84.2   | 85.41666667 | 1.150198051 |
| 12h                 | 92.31  | 91.34  | 92.56  | 92.07       | 0.526181211 |
| 24h                 | 94.9   | 94.07  | 97.48  | 95.48333333 | 1.451948882 |
| 48h                 | 92.93  | 91.75  | 93.44  | 92.70666667 | 0.707782138 |
| 0.1% CFB            | Test 1 | Test 2 | Test 3 | Average     | SD          |
| 2h                  | 0      | 0      | 0      | 0           | 0           |
| 8h                  | 5.45   | 3.13   | 4.44   | 4.34        | 0.949771902 |
| 12h                 | 16.52  | 15     | 18     | 16.50666667 | 1.22478116  |
| 24h                 | 17.78  | 18.18  | 20.97  | 18.97666667 | 1.418927608 |
| 48h                 | 17.26  | 17.64  | 19.39  | 18.09666667 | 0.927589469 |
