# Supplementary material for: The antagonistic mechanism of Bacillus velezensis ZW10 against rice blast disease: Evaluation of ZW10 as a potential biopesticide
Source: PubMed Central journal article supplement (PMC8396770; doi:10.1371/journal.pone.0256807), 2021-08-27
Supplement: pone.0256807.s003.pdf [file pone.0256807.s003.pdf]

| OsLYP6  |          |       |           |       |           |      |         |             |       |
|---------|----------|-------|-----------|-------|-----------|------|---------|-------------|-------|
| Wells   | Reporter | ACTIN | SD Avg Ct | LYP   | SD Avg Ct | Δ Ct | Rel Exp | Avg Rel Exp | SD RX |
| CK 0    | SYBR     | 28.27 | 0.43      | 33.96 | 0.59      | 5.69 | TRUE    | 1.00        | 0.00  |
|         |          | 27.95 |           | 32.80 |           | 4.84 | 1.00    |             |       |
|         | SYBR     | 27.42 |           | 33.58 |           | 6.16 | 1.00    |             |       |
| CK 24   | SYBR     | 29.26 | 0.12      | 36.73 | 0.38      | 7.46 | 0.27    | 0.20        | 0.07  |
|         |          | 29.15 |           | 37.15 |           | 8.01 | 0.18    |             |       |
|         | SYBR     | 29.02 |           | 37.49 |           | 8.47 | 0.13    |             |       |
| CK 48   | SYBR     | 31.32 | 0.19      | 37.10 | 0.22      | 5.78 | 0.86    | 1.16        | 0.30  |
|         |          | 31.40 |           | 36.75 |           | 5.36 | 1.15    |             |       |
|         | SYBR     | 31.68 |           | 36.69 |           | 5.01 | 1.46    |             |       |
| CK 72   | SYBR     | 28.89 | 0.81      | 35.07 | 0.47      | 6.18 | 0.65    | 0.67        | 0.21  |
|         |          | 27.48 |           | 34.13 |           | 6.65 | 0.47    |             |       |
|         | SYBR     | 28.85 |           | 34.57 |           | 5.72 | 0.90    |             |       |
| ZW10 0  | SYBR     | 25.73 | 0.34      | 33.73 | 0.51      | 8.00 | 0.18    | 0.16        | 0.04  |
|         |          | 25.31 |           | 34.04 |           | 8.73 | 0.11    |             |       |
|         | SYBR     | 25.06 |           | 33.04 |           | 7.98 | 0.19    |             |       |
| ZW10 24 | SYBR     | 25.73 | 0.42      | 32.60 | 0.32      | 6.87 | 0.40    | 0.50        | 0.13  |
|         |          | 25.30 |           | 31.97 |           | 6.66 | 0.47    |             |       |
|         | SYBR     | 26.14 |           | 32.33 |           | 6.19 | 0.65    |             |       |
| ZW10 48 | SYBR     | 27.24 | 0.18      | 30.33 | 0.24      | 3.09 | 5.54    | 5.56        | 0.22  |
|         |          | 27.07 |           | 30.10 |           | 3.03 | 5.79    |             |       |
|         | SYBR     | 27.43 |           | 30.57 |           | 3.14 | 5.35    |             |       |
| ZW10 72 | SYBR     | 27.42 | 0.25      | 34.60 | 0.53      | 7.18 | 0.33    | 0.24        | 0.07  |
|         |          | 27.36 |           | 35.26 |           | 7.90 | 0.20    |             |       |
|         | SYBR     | 27.82 |           | 35.65 |           | 7.84 | 0.21    |             |       |

| OsPR10a |          |       |           |        |           |      |         |             |       |
|---------|----------|-------|-----------|--------|-----------|------|---------|-------------|-------|
| Wells   | Reporter | ACTIN | SD Avg Ct | PR10 a | SD Avg Ct | Δ Ct | Rel Exp | Avg Rel Exp | SD RX |
| CK 0    | SYBR     | 28.27 | 0.43      | 30.48  | 0.41      | 2.21 | TRUE    | 1.00        | 0.00  |
|         |          | 27.95 |           | 30.44  |           | 2.49 | 1.00    |             |       |
|         | SYBR     | 27.42 |           | 31.18  |           | 3.75 | 1.00    |             |       |
| CK 24   | SYBR     | 29.26 | 0.12      | 31.75  | 0.73      | 2.49 | 8.41    | 13.28       | 5.63  |
|         |          | 29.15 |           | 31.13  |           | 1.98 | 11.97   |             |       |
|         | SYBR     | 29.02 |           | 30.30  |           | 1.28 | 19.45   |             |       |

|                |      |       |      |       |      |       |       |       |      |
|----------------|------|-------|------|-------|------|-------|-------|-------|------|
| CK 48          | SYBR | 31.32 | 0.19 | 32.52 | 0.61 | 1.20  | 20.53 | 15.08 | 4.82 |
|                |      | 31.40 |      | 33.22 |      | 1.82  | 13.36 |       |      |
|                | SYBR | 31.68 |      | 33.73 |      | 2.06  | 11.36 |       |      |
| CK 72          | SYBR | 28.89 | 0.81 | 33.76 | 0.82 | 4.87  | 1.62  | 1.85  | 0.24 |
|                |      | 27.48 |      | 32.17 |      | 4.70  | 1.82  |       |      |
|                | SYBR | 28.85 |      | 33.34 |      | 4.49  | 2.10  |       |      |
| ZW100<br>\<br> | SYBR | 25.73 | 0.34 | 30.83 | 0.46 | 5.11  | 1.37  | 1.42  | 0.44 |
|                |      | 25.31 |      | 29.95 |      | 4.65  | 1.89  |       |      |
|                | SYBR | 25.06 |      | 30.61 |      | 5.55  | 1.01  |       |      |
| ZW10 24        | SYBR | 25.73 | 0.42 | 27.13 | 0.26 | 1.40  | 17.93 | 17.17 | 2.02 |
|                |      | 25.30 |      | 26.97 |      | 1.67  | 14.88 |       |      |
|                | SYBR | 26.14 |      | 27.47 |      | 1.34  | 18.70 |       |      |
| ZW10 48        | SYBR | 27.24 | 0.18 | 26.23 | 0.19 | -1.01 | 95.08 | 89.58 | 4.78 |
|                |      | 27.07 |      | 26.20 |      | -0.87 | 86.38 |       |      |
|                | SYBR | 27.43 |      | 26.54 |      | -0.89 | 87.28 |       |      |
| ZW10 72        | SYBR | 27.42 | 0.25 | 30.49 | 0.17 | 3.06  | 5.66  | 6.63  | 0.95 |
|                |      | 27.36 |      | 30.18 |      | 2.82  | 6.69  |       |      |
|                | SYBR | 27.82 |      | 30.46 |      | 2.64  | 7.55  |       |      |

| OsPR1a         |          |       |           |           |           |       |         |                |       |
|----------------|----------|-------|-----------|-----------|-----------|-------|---------|----------------|-------|
| Wells          | Reporter | ACTIN | SD Avg Ct | PR10<br>a | SD Avg Ct | Δ Ct  | Rel Exp | Avg Rel<br>Exp | SD RX |
| CK 0           | SYBR     | 28.27 | 0.43      | 38.74     | 0.37      | 10.46 | TRUE    | 1.00           | 0.00  |
|                |          | 27.95 |           | 39.19     |           | 11.24 | 1.00    |                |       |
|                | SYBR     | 27.42 |           | 39.46     |           | 12.04 | 1.00    |                |       |
| CK 24          | SYBR     | 29.26 | 0.12      | 37.17     | 0.50      | 7.91  | 0.20    | 0.28           | 0.07  |
|                |          | 29.15 |           | 36.40     |           | 7.25  | 0.31    |                |       |
|                | SYBR     | 29.02 |           | 36.23     |           | 7.20  | 0.32    |                |       |
| CK 48          | SYBR     | 31.32 | 0.19      | 39.26     | 0.10      | 7.94  | 0.19    | 0.20           | 0.02  |
|                |          | 31.40 |           | 39.38     |           | 7.99  | 0.19    |                |       |
|                | SYBR     | 31.68 |           | 39.45     |           | 7.78  | 0.22    |                |       |
| CK 72          | SYBR     | 28.89 | 0.81      | 35.57     | 0.47      | 6.68  | 0.46    | 0.42           | 0.10  |
|                |          | 27.48 |           | 34.70     |           | 7.22  | 0.32    |                |       |
|                | SYBR     | 28.85 |           | 35.43     |           | 6.57  | 0.50    |                |       |
| ZW100<br>\<br> | SYBR     | 25.73 | 0.34      | 35.10     | 0.62      | 9.37  | 0.07    | 0.07           | 0.02  |
|                |          | 25.31 |           | 35.30     |           | 9.99  | 0.05    |                |       |
|                | SYBR     | 25.06 |           | 34.13     |           | 9.07  | 0.09    |                |       |

|         |      |       |      |       |      |      |      |      |      |
|---------|------|-------|------|-------|------|------|------|------|------|
| ZW10 24 | SYBR | 25.73 | 0.42 | 32.13 | 0.15 | 6.40 | 0.56 | 0.55 | 0.10 |
|         |      | 25.30 |      | 32.04 |      | 6.74 | 0.44 |      |      |
|         | SYBR | 26.14 |      | 32.34 |      | 6.21 | 0.64 |      |      |
| ZW10 48 | SYBR | 27.24 | 0.18 | 32.22 | 0.14 | 4.98 | 1.49 | 1.54 | 0.06 |
|         |      | 27.07 |      | 32.03 |      | 4.96 | 1.52 |      |      |
|         | SYBR | 27.43 |      | 32.30 |      | 4.87 | 1.62 |      |      |
| ZW10 72 | SYBR | 27.42 | 0.25 | 36.35 | 0.73 | 8.92 | 0.10 | 0.13 | 0.05 |
|         |      | 27.36 |      | 35.36 |      | 8.00 | 0.18 |      |      |
|         | SYBR | 27.82 |      | 36.78 |      | 8.96 | 0.09 |      |      |

| OsPOD           |          |       |           |       |           |       |         |             |       |
|-----------------|----------|-------|-----------|-------|-----------|-------|---------|-------------|-------|
| Wells           | Reporter | ACTIN | SD Avg Ct | POD   | SD Avg Ct | Δ Ct  | Rel Exp | Avg Rel Exp | SD RX |
| CK 0            | SYBR     | 28.27 | 0.43      | 28.86 | 0.34      | 0.59  | TRUE    | 1.00        | 0.00  |
|                 |          | 27.95 |           | 28.25 |           | 0.30  | 1.00    |             |       |
|                 | SYBR     | 27.42 |           | 28.28 |           | 0.85  | 1.00    |             |       |
| CK 24           | SYBR     | 29.26 | 0.12      | 28.84 | 0.39      | -0.42 | 63.28   | 76.88       | 14.71 |
|                 |          | 29.15 |           | 28.48 |           | -0.66 | 74.86   |             |       |
|                 | SYBR     | 29.02 |           | 28.05 |           | -0.97 | 92.50   |             |       |
| CK 48           | SYBR     | 31.32 | 0.19      | 34.22 | 0.38      | 2.90  | 6.34    | 5.28        | 0.94  |
|                 |          | 31.40 |           | 34.77 |           | 3.37  | 4.56    |             |       |
|                 | SYBR     | 31.68 |           | 34.93 |           | 3.26  | 4.95    |             |       |
| CK 72           | SYBR     | 28.89 | 0.81      | 32.88 | 0.40      | 3.99  | 2.97    | 3.13        | 1.36  |
|                 |          | 27.48 |           | 32.14 |           | 4.67  | 1.86    |             |       |
|                 | SYBR     | 28.85 |           | 32.23 |           | 3.37  | 4.56    |             |       |
| ZW10 0<br>\<br> | SYBR     | 25.73 | 0.34      | 26.69 | 0.33      | 0.97  | 24.18   | 23.81       | 0.62  |
|                 |          | 25.31 |           | 26.34 |           | 1.03  | 23.09   |             |       |
|                 | SYBR     | 25.06 |           | 26.03 |           | 0.97  | 24.17   |             |       |
| ZW10 24         | SYBR     | 25.73 | 0.42      | 27.15 | 0.16      | 1.42  | 17.64   | 17.61       | 3.08  |
|                 |          | 25.30 |           | 27.01 |           | 1.70  | 14.51   |             |       |
|                 | SYBR     | 26.14 |           | 27.33 |           | 1.19  | 20.67   |             |       |
| ZW10 48         | SYBR     | 27.24 | 0.18      | 25.42 | 0.14      | -1.82 | 166.29  | 173.86      | 8.36  |
|                 |          | 27.07 |           | 25.20 |           | -1.87 | 172.46  |             |       |
|                 | SYBR     | 27.43 |           | 25.47 |           | -1.95 | 182.83  |             |       |
| ZW10 72         | SYBR     | 27.42 | 0.25      | 30.18 | 0.24      | 2.76  | 6.99    | 7.34        | 0.31  |
|                 |          | 27.36 |           | 30.00 |           | 2.64  | 7.58    |             |       |
|                 | SYBR     | 27.82 |           | 30.48 |           | 2.66  | 7.46    |             |       |





|         |             |       |             |       |             |              |              |              |             |
|---------|-------------|-------|-------------|-------|-------------|--------------|--------------|--------------|-------------|
|         | <i>SYBR</i> | 28.85 |             | 29.03 |             | <i>0.17</i>  | <i>41.85</i> |              |             |
| ZW10 0  | <i>SYBR</i> | 25.73 | <i>0.34</i> | 31.57 | <i>0.65</i> | <i>5.84</i>  | <i>0.82</i>  | <i>1.08</i>  | <i>0.23</i> |
| \       |             | 25.31 |             | 30.58 |             | <i>5.27</i>  | <i>1.22</i>  |              |             |
|         | <i>SYBR</i> | 25.06 |             | 30.35 |             | <i>5.29</i>  | <i>1.20</i>  |              |             |
| ZW10 24 | <i>SYBR</i> | 25.73 | <i>0.42</i> | 28.48 | <i>0.43</i> | <i>2.74</i>  | <i>7.05</i>  | <i>8.42</i>  | <i>1.23</i> |
|         |             | 25.30 |             | 27.73 |             | <i>2.42</i>  | <i>8.80</i>  |              |             |
|         | <i>SYBR</i> | 26.14 |             | 28.46 |             | <i>2.33</i>  | <i>9.42</i>  |              |             |
| ZW10 48 | <i>SYBR</i> | 27.24 | <i>0.18</i> | 27.10 | <i>0.16</i> | <i>-0.14</i> | <i>51.95</i> | <i>48.62</i> | <i>3.25</i> |
|         |             | 27.07 |             | 27.13 |             | <i>0.06</i>  | <i>45.46</i> |              |             |
|         | <i>SYBR</i> | 27.43 |             | 27.39 |             | <i>-0.04</i> | <i>48.46</i> |              |             |
| ZW10 72 | <i>SYBR</i> | 27.42 | <i>0.25</i> | 33.01 | <i>0.13</i> | <i>5.59</i>  | <i>0.98</i>  | <i>1.07</i>  | <i>0.11</i> |
|         |             | 27.36 |             | 32.87 |             | <i>5.51</i>  | <i>1.04</i>  |              |             |
|         | <i>SYBR</i> | 27.82 |             | 33.13 |             | <i>5.31</i>  | <i>1.19</i>  |              |             |
