# Supplementary material for: The antagonistic mechanism of Bacillus velezensis ZW10 against rice blast disease: Evaluation of ZW10 as a potential biopesticide
Source: PubMed Central journal article supplement (PMC8396770; doi:10.1371/journal.pone.0256807), 2021-08-27
Supplement: pone.0256807.s004.pdf [file pone.0256807.s004.pdf]

Leaf blast

| Water  |                   | Landy medium |                   | Carbendazim |                   | 1% CFB |                   |
|--------|-------------------|--------------|-------------------|-------------|-------------------|--------|-------------------|
| leaves | disease index (%) | leaves       | disease index (%) | leaves      | disease index (%) | leaves | disease index (%) |
| 6      | 82.000            | 6            | 84.000            | 7           | 13.714            | 3      | 14.667            |
| 7      | 78.857            | 6            | 84.000            | 5           | 16.800            | 5      | 16.000            |
| 6      | 76.000            | 7            | 78.286            | 9           | 20.889            | 6      | 19.333            |
| 4      | 88.000            | 5            | 75.200            | 4           | 18.000            | 3      | 17.333            |
| 5      | 76.800            | 5            | 78.400            | 3           | 20.000            | 6      | 17.333            |
| 8      | 86.000            | 8            | 91.500            | 8           | 20.000            | 8      | 19.000            |
| 10     | 66.800            | 10           | 78.800            | 7           | 17.143            | 3      | 17.333            |
| 3      | 96.000            | 4            | 82.000            | 4           | 21.000            | 6      | 16.667            |
| 6      | 76.667            | 5            | 79.200            | 4           | 17.000            | 4      | 17.000            |
| 6      | 72.000            | 4            | 84.000            | 8           | 20.000            | 3      | 20.000            |
| 6      | 86.000            | 6            | 80.000            | 9           | 19.111            | 6      | 18.667            |
| 6      | 75.333            | 8            | 89.500            | 8           | 19.500            | 3      | 17.333            |
| 4      | 94.000            | 4            | 94.000            | 4           | 22.000            | 4      | 18.000            |
| 5      | 79.200            | 8            | 79.500            | 5           | 18.400            | 5      | 16.800            |
| 6      | 82.000            | 6            | 68.667            | 4           | 18.000            | 4      | 21.000            |
| 2      | 92.000            | 9            | 80.889            | 6           | 16.000            | 3      | 18.667            |
| 6      | 84.667            | 6            | 75.333            | 4           | 21.000            | 4      | 17.000            |
| 2      | 84.000            | 5            | 78.400            | 2           | 16.000            | 5      | 16.800            |
| 7      | 72.571            | 6            | 83.333            | 5           | 16.000            | 5      | 16.800            |
| 10     | 81.200            | 10           | 68.800            | 3           | 18.667            | 10     | 19.200            |
| 4      | 82.000            | 4            | 90.000            | 4           | 19.000            | 9      | 15.556            |
| 8      | 86.500            | 8            | 82.000            | 7           | 16.000            | 8      | 17.500            |
| 4      | 88.000            | 6            | 81.333            | 8           | 18.500            | 3      | 17.333            |
| 6      | 78.667            | 6            | 71.333            | 3           | 17.333            | 3      | 21.333            |
| 6      | 78.000            | 6            | 79.333            | 6           | 14.667            | 6      | 17.333            |
| 7      | 84.000            | 7            | 77.143            | 7           | 17.143            | 7      | 17.714            |
| 7      | 73.714            | 6            | 83.333            | 5           | 19.200            | 5      | 16.800            |
| 8      | 84.500            | 8            | 91.000            | 8           | 20.000            | 8      | 18.500            |
| 6      | 77.333            | 6            | 81.333            | 2           | 10.000            | 4      | 17.000            |
| 6      | 86.667            | 7            | 77.714            | 3           | 21.333            | 5      | 19.200            |
| 3      | 77.333            | 5            | 83.200            | 7           | 17.714            | 3      | 16.000            |
| 8      | 87.500            | 8            | 84.500            | 8           | 19.500            | 8      | 18.000            |
| 7      | 68.000            | 6            | 76.667            | 5           | 18.400            | 5      | 19.200            |
| 9      | 83.111            | 7            | 76.000            | 7           | 18.857            | 7      | 16.571            |
| 3      | 96.000            | 6            | 77.333            | 4           | 18.000            | 3      | 17.333            |
| 5      | 78.400            | 3            | 80.000            | 7           | 15.429            | 5      | 16.800            |
| 6      | 80.667            | 7            | 77.714            | 7           | 17.714            | 3      | 18.667            |
| 4      | 84.000            | 10           | 74.400            | 8           | 18.500            | 4      | 19.000            |

|    |        |    |        |    |        |    |        |
|----|--------|----|--------|----|--------|----|--------|
| 2  | 76.000 | 6  | 81.333 | 3  | 17.333 | 10 | 16.400 |
| 6  | 78.000 | 6  | 78.667 | 9  | 20.000 | 6  | 16.667 |
| 6  | 73.333 | 3  | 85.333 | 7  | 19.429 | 4  | 18.000 |
| 10 | 78.400 | 8  | 84.500 | 4  | 18.000 | 10 | 13.600 |
| 7  | 86.286 | 7  | 77.714 | 6  | 15.333 | 4  | 14.000 |
| 5  | 81.600 | 6  | 85.333 | 3  | 22.667 | 5  | 15.200 |
| 3  | 85.333 | 9  | 77.333 | 5  | 19.200 | 4  | 17.000 |
| 9  | 83.111 | 7  | 78.857 | 7  | 20.000 | 7  | 20.000 |
| 7  | 73.714 | 6  | 77.333 | 5  | 16.000 | 5  | 17.600 |
| 6  | 73.333 | 4  | 82.000 | 6  | 20.667 | 4  | 16.000 |
| 10 | 72.800 | 10 | 68.800 | 10 | 14.400 | 10 | 18.800 |
| 9  | 79.111 | 9  | 85.778 | 7  | 20.000 | 7  | 18.286 |
| 8  | 96.000 | 9  | 84.000 | 8  | 18.500 | 8  | 16.500 |
| 8  | 84.000 | 8  | 86.000 | 8  | 18.500 | 8  | 19.500 |
| 5  | 84.000 | 7  | 80.000 | 6  | 17.333 | 4  | 15.000 |
| 6  | 82.667 | 4  | 88.000 | 6  | 18.000 | 3  | 17.333 |
| 4  | 73.000 | 6  | 86.000 | 5  | 13.600 | 2  | 18.000 |
| 5  | 81.600 | 5  | 77.600 | 6  | 16.000 | 4  | 18.000 |
| 9  | 84.000 | 7  | 80.571 | 7  | 16.000 | 7  | 18.286 |
| 6  | 72.000 | 6  | 80.000 | 7  | 13.714 | 4  | 21.000 |
| 10 | 67.200 | 10 | 73.600 | 4  | 21.000 | 4  | 17.000 |
| 6  | 72.667 | 7  | 73.143 | 9  | 20.889 | 6  | 17.333 |
| 3  | 77.333 | 6  | 73.333 | 3  | 21.333 | 3  | 18.667 |
| 7  | 76.571 | 7  | 83.429 | 7  | 20.000 | 7  | 19.429 |
| 6  | 68.667 | 6  | 78.000 | 6  | 15.333 | 6  | 18.000 |
| 5  | 82.400 | 5  | 77.600 | 6  | 16.667 | 4  | 15.000 |
| 5  | 73.600 | 4  | 84.000 | 3  | 17.333 | 9  | 14.667 |
| 5  | 88.000 | 7  | 85.714 | 5  | 19.200 | 5  | 16.800 |
| 5  | 89.600 | 3  | 77.333 | 6  | 19.333 | 6  | 19.333 |
| 3  | 85.333 | 5  | 76.800 | 5  | 18.400 | 6  | 16.667 |
| 8  | 82.500 | 8  | 81.500 | 8  | 18.000 | 7  | 17.714 |
| 7  | 83.429 | 7  | 72.000 | 7  | 14.286 | 4  | 12.000 |
| 5  | 78.400 | 5  | 72.000 | 4  | 19.000 | 4  | 19.000 |
| 7  | 77.714 | 6  | 86.000 | 5  | 14.400 | 5  | 18.400 |
| 7  | 84.571 | 5  | 78.400 | 6  | 16.667 | 5  | 20.800 |
| 7  | 77.143 | 6  | 86.667 | 5  | 15.200 | 5  | 15.200 |
| 6  | 76.000 | 5  | 75.200 | 7  | 16.000 | 3  | 17.333 |
| 10 | 67.200 | 10 | 70.000 | 4  | 19.000 | 10 | 18.800 |
| 6  | 78.000 | 5  | 84.800 | 4  | 18.000 | 4  | 17.000 |
| 7  | 72.571 | 6  | 76.667 | 5  | 16.800 | 5  | 19.200 |
| 8  | 91.000 | 6  | 78.667 | 7  | 17.714 | 7  | 21.714 |
| 7  | 78.286 | 5  | 73.600 | 7  | 16.571 | 7  | 18.857 |

|    |        |    |        |    |        |    |        |
|----|--------|----|--------|----|--------|----|--------|
| 4  | 80.000 | 6  | 68.000 | 4  | 18.000 | 5  | 19.200 |
| 3  | 80.000 | 5  | 76.000 | 6  | 16.667 | 3  | 17.333 |
| 5  | 83.200 | 10 | 79.200 | 6  | 16.000 | 4  | 16.000 |
| 10 | 68.400 | 5  | 83.200 | 10 | 20.000 | 10 | 20.000 |
| 4  | 86.000 | 7  | 75.429 | 6  | 18.667 | 5  | 20.000 |
| 6  | 73.333 | 10 | 65.600 | 9  | 21.778 | 6  | 14.000 |
| 10 | 84.800 | 8  | 81.000 | 4  | 18.000 | 10 | 14.000 |
| 8  | 75.000 | 6  | 85.333 | 6  | 18.000 | 5  | 17.600 |
| 7  | 79.429 | 7  | 73.714 | 5  | 17.600 | 5  | 16.000 |
| 6  | 75.333 | 8  | 87.500 | 9  | 22.667 | 6  | 16.000 |
| 8  | 82.000 | 10 | 67.200 | 8  | 18.000 | 7  | 17.714 |
| 10 | 73.200 | 5  | 75.200 | 10 | 19.200 | 10 | 18.400 |
| 5  | 81.600 | 7  | 76.571 | 6  | 16.000 | 4  | 15.000 |
| 6  | 80.667 | 7  | 78.857 | 9  | 21.778 | 6  | 18.000 |
| 7  | 80.571 | 5  | 75.200 | 7  | 19.429 | 7  | 20.571 |
| 3  | 85.333 | 7  | 79.429 | 2  | 18.000 | 5  | 17.600 |
| 6  | 72.667 | 8  | 86.500 | 7  | 13.143 | 3  | 18.667 |
| 9  | 87.556 | 5  | 69.600 | 7  | 17.714 | 7  | 17.143 |
| 6  | 75.333 | 8  | 84.000 | 4  | 19.000 | 4  | 18.000 |
| 8  | 84.500 | 7  | 80.571 | 8  | 16.500 | 7  | 16.571 |
| 6  | 85.333 | 8  | 86.000 | 4  | 21.000 | 6  | 21.333 |
| 5  | 87.200 | 10 | 72.000 | 5  | 19.200 | 5  | 20.000 |
| 10 | 82.000 | 10 | 67.200 | 10 | 15.200 | 10 | 14.000 |
| 10 | 80.800 | 7  | 74.857 | 10 | 18.000 | 10 | 20.000 |
| 6  | 72.667 | 10 | 66.800 | 9  | 22.222 | 6  | 16.667 |
| 10 | 79.200 | 5  | 83.200 | 4  | 8.000  | 10 | 21.600 |
| 5  | 75.200 | 8  | 84.000 | 6  | 17.333 | 6  | 17.333 |
| 8  | 84.500 | 10 | 85.600 | 8  | 17.500 | 8  | 20.000 |
| 10 | 75.200 | 9  | 85.333 | 10 | 10.000 | 11 | 22.545 |
| 4  | 82.000 | 7  | 77.143 | 6  | 16.667 | 2  | 16.000 |
| 9  | 85.778 | 5  | 81.600 | 7  | 18.286 | 7  | 20.571 |
| 4  | 76.000 | 5  | 82.400 | 5  | 16.800 | 12 | 16.333 |
| 5  | 78.400 | 7  | 78.286 | 4  | 17.000 | 4  | 19.000 |
| 9  | 75.111 | 5  | 74.400 | 7  | 14.857 | 7  | 20.000 |
| 6  | 80.667 | 6  | 80.667 | 3  | 18.667 | 6  | 19.333 |
| 6  | 80.667 | 5  | 73.600 | 9  | 20.000 | 6  | 18.667 |
| 3  | 82.667 | 4  | 76.000 | 6  | 18.000 | 4  | 17.000 |
| 5  | 79.200 | 6  | 82.667 | 5  | 18.400 | 3  | 21.333 |
| 5  | 84.800 | 9  | 85.333 | 6  | 18.000 | 4  | 17.000 |
| 8  | 81.500 | 5  | 84.800 | 8  | 19.000 | 8  | 18.500 |
| 4  | 86.000 | 6  | 72.667 | 4  | 14.000 | 5  | 17.600 |
| 7  | 79.429 | 10 | 72.400 | 5  | 16.800 | 5  | 16.800 |

|    |        |    |        |    |        |    |        |
|----|--------|----|--------|----|--------|----|--------|
| 10 | 78.400 | 10 | 71.600 | 4  | 15.000 | 4  | 20.000 |
| 5  | 86.400 | 8  | 81.000 | 4  | 17.000 | 4  | 18.000 |
| 8  | 79.000 | 6  | 78.667 | 7  | 18.857 | 7  | 17.143 |
| 4  | 74.000 | 8  | 84.000 | 6  | 18.667 | 5  | 15.200 |
| 8  | 86.500 | 6  | 70.000 | 8  | 20.500 | 8  | 17.500 |
| 7  | 78.857 | 8  | 75.000 | 5  | 15.200 | 5  | 16.800 |
| 8  | 89.000 | 3  | 74.667 | 8  | 16.500 | 8  | 19.000 |
| 6  | 80.667 | 10 | 67.200 | 6  | 18.000 | 6  | 16.667 |
| 10 | 74.800 | 6  | 80.667 | 5  | 16.800 | 10 | 12.800 |
| 7  | 75.429 | 5  | 87.200 | 5  | 18.400 | 5  | 18.400 |
| 7  | 81.143 | 8  | 84.000 | 7  | 16.571 | 5  | 18.400 |
| 3  | 77.333 | 10 | 66.800 | 5  | 16.800 | 4  | 18.000 |
| 10 | 60.800 | 6  | 84.000 | 10 | 13.600 | 10 | 18.000 |
| 5  | 84.800 | 6  | 78.667 | 7  | 15.429 | 4  | 18.000 |
| 2  | 94.000 | 7  | 79.429 | 5  | 18.400 | 6  | 16.667 |
| 9  | 85.778 | 8  | 88.000 | 7  | 15.429 | 7  | 19.429 |
| 9  | 83.556 | 6  | 78.667 | 7  | 14.286 | 7  | 17.714 |
| 6  | 80.000 | 9  | 75.556 | 3  | 17.333 | 4  | 21.000 |
| 2  | 88.000 | 9  | 83.111 | 3  | 14.667 | 5  | 17.600 |
| 8  | 78.500 | 6  | 81.333 | 8  | 18.000 | 8  | 18.000 |
| 5  | 86.400 | 8  | 89.500 | 5  | 19.200 | 3  | 16.000 |
| 9  | 84.000 | 5  | 84.800 | 7  | 19.429 | 7  | 18.857 |
| 3  | 82.667 | 10 | 66.400 | 4  | 19.000 | 3  | 18.667 |
| 10 | 83.600 | 5  | 80.800 | 6  | 16.667 | 10 | 13.200 |
| 5  | 83.200 | 7  | 73.714 | 6  | 16.667 | 4  | 14.000 |
| 6  | 74.667 | 6  | 82.000 | 9  | 20.889 | 6  | 18.000 |
| 6  | 78.667 | 5  | 76.000 | 9  | 19.556 | 6  | 14.000 |
| 5  | 77.600 | 6  | 78.667 | 4  | 15.000 | 4  | 18.000 |
| 6  | 71.333 |    |        | 6  | 14.000 | 6  | 16.667 |
| 4  | 73.000 |    |        | 5  | 19.200 | 6  | 17.333 |
| 3  | 80.000 |    |        | 3  | 22.667 | 5  | 20.000 |
|    |        |    |        | 8  | 18.500 | 12 | 16.333 |
|    |        |    |        | 6  | 18.667 | 5  | 17.600 |
|    |        |    |        | 5  | 13.600 | 5  | 19.200 |
|    |        |    |        | 3  | 20.000 |    |        |
|    |        |    |        | 6  | 18.667 |    |        |
|    |        |    |        | 5  | 16.800 |    |        |
|    |        |    |        | 4  | 18.000 |    |        |
|    |        |    |        | 7  | 17.714 |    |        |

| Disease index |       |     |              |             |         |
|---------------|-------|-----|--------------|-------------|---------|
| Water         |       |     | Landy medium |             |         |
| Mean          | SD    | N   | Mean         | SD          | N       |
| 80.30259363   | 6.090 | 153 | 79.188       | 5.799863851 | 150.000 |
| Carbendazim   |       |     | 1% CFB       |             |         |
| Mean          | SD    | N   | Mean         | SD          | N       |
| 17.72080252   | 2.379 | 161 | 17.69521405  | 1.885156169 | 156     |

### Panicle blast

| Water             |                      | Landy medium      |                      | Carbendazim       |                      | 1% CFB            |                      |
|-------------------|----------------------|-------------------|----------------------|-------------------|----------------------|-------------------|----------------------|
| disease index / % | thousand seed weight | disease index / % | thousand seed weight | disease index / % | thousand seed weight | disease index / % | thousand seed weight |
| 72.00             | 24.800               | 72.00             | 14.375               | 32.00             | 30.800               | 32.00             | 34.200               |
| 70.00             | 15.833               | 70.00             | 19.500               | 35.00             | 28.667               | 36.67             | 27.333               |
| 66.67             | 21.667               | 68.33             | 13.429               | 20.00             | 39.500               | 31.67             | 36.000               |
| 71.25             | 15.750               | 75.00             | 18.714               | 35.00             | 31.125               | 32.50             | 30.750               |
| 71.43             | 16.857               | 63.33             | 15.857               | 31.25             | 35.000               | 32.50             | 30.625               |
| 70.00             | 22.857               | 72.86             | 12.875               | 30.00             | 36.857               | 30.00             | 36.000               |
| 68.57             | 22.286               | 67.14             | 13.556               | 32.86             | 33.143               | 32.86             | 29.286               |
| 72.86             | 15.714               | 62.86             | 17.000               | 32.86             | 33.714               | 30.00             | 36.429               |
| 76.25             | 13.500               | 71.25             | 10.000               | 31.25             | 36.125               | 35.00             | 32.375               |
| 78.75             | 16.125               | 83.33             | 17.300               | 32.22             | 25.000               | 32.00             | 31.600               |
| 71.43             | 16.571               | 71.43             | 17.000               | 32.86             | 30.000               | 30.00             | 34.286               |
| 72.50             | 15.000               | 77.14             | 11.750               | 35.00             | 32.000               | 31.25             | 35.250               |
| 68.33             | 15.833               | 76.00             | 14.714               | 36.67             | 33.167               | 30.00             | 34.286               |
| 67.50             | 18.500               | 67.50             | 16.667               | 37.50             | 29.875               | 37.50             | 32.750               |
| 70.00             | 14.889               | 83.75             | 19.400               | 31.82             | 24.909               | 31.43             | 36.286               |
| 65.00             | 18.500               | 71.43             | 15.571               | 35.56             | 33.000               | 35.71             | 31.429               |
| 66.67             | 15.833               | 68.33             | 16.857               | 28.33             | 36.167               | 31.67             | 33.833               |
| 70.00             | 14.750               | 62.00             | 18.286               | 32.50             | 42.000               | 32.00             | 31.200               |
| 70.00             | 16.714               | 68.57             | 15.571               | 34.29             | 33.429               | 35.71             | 30.286               |
| 70.00             | 17.429               | 74.29             | 15.375               | 30.00             | 34.286               | 34.29             | 31.143               |
| 70.00             | 16.714               | 71.43             | 15.778               | 32.86             | 32.000               | 30.00             | 34.714               |
| 70.00             |                      | 51.43             | 16.000               | 31.25             |                      | 36.25             | 31.000               |
| 68.89             |                      | 66.25             | 16.667               | 36.00             |                      | 28.00             |                      |
| 70.00             |                      | 73.33             |                      | 40.00             |                      | 32.22             |                      |

|       |       |       |       |
|-------|-------|-------|-------|
| 71.00 | 74.00 | 21.67 | 35.00 |
| 68.33 | 73.33 | 31.67 | 43.33 |
| 65.00 | 70.00 | 30.00 | 31.67 |
| 65.56 | 82.50 | 33.75 | 36.25 |
| 70.00 | 80.00 | 42.50 | 30.00 |
| 68.89 | 64.44 | 38.89 | 33.33 |
| 68.57 | 78.57 | 31.43 | 32.86 |
| 63.33 | 75.00 | 35.00 | 35.00 |
| 70.00 | 70.00 | 33.75 | 31.43 |
| 70.00 | 70.00 | 33.33 | 28.33 |
| 70.00 | 68.57 | 31.43 | 35.71 |
| 78.18 | 38.57 | 33.00 | 32.50 |
| 67.78 | 40.00 | 40.00 | 35.00 |
| 70.00 | 67.14 | 31.43 | 35.71 |
| 65.00 | 66.67 | 26.67 | 31.67 |
| 71.25 | 75.00 | 33.75 | 33.75 |
| 68.57 | 71.43 | 36.25 | 35.00 |
| 70.00 | 74.29 | 32.86 | 34.29 |
| 70.00 | 57.14 | 35.71 | 34.29 |
| 66.67 | 73.33 | 33.33 | 46.67 |
| 63.75 | 72.50 | 35.00 | 36.25 |
| 78.89 | 72.22 | 33.75 | 31.00 |
| 70.00 | 71.43 | 31.43 | 32.86 |
| 73.75 | 69.00 | 31.67 | 34.44 |
| 65.00 | 68.33 | 33.33 | 30.00 |
| 71.00 | 65.71 | 33.00 | 34.29 |
| 65.56 | 70.00 | 36.67 | 28.89 |
| 71.25 | 50.00 | 36.25 | 32.86 |
| 68.33 | 70.00 | 23.33 | 36.67 |
| 63.33 | 77.50 | 33.33 | 33.75 |
| 67.78 | 63.33 | 35.56 | 29.00 |
| 68.57 | 72.50 | 36.67 | 33.33 |
| 70.00 | 76.25 | 30.00 | 34.44 |
| 68.33 | 76.67 | 31.67 | 31.67 |
| 68.89 | 81.67 | 30.00 | 34.00 |
| 76.25 | 70.00 | 30.00 | 33.75 |
| 68.33 | 72.50 | 37.00 | 26.25 |
| 65.56 | 63.33 | 33.33 | 25.56 |
| 65.71 | 63.33 | 34.29 | 35.71 |
| 77.50 | 73.75 | 37.50 | 31.25 |
| 76.25 | 67.50 | 31.67 | 22.22 |
| 65.71 | 68.75 | 30.00 | 30.00 |

|       |       |       |       |
|-------|-------|-------|-------|
| 70.00 | 67.50 | 37.14 | 32.50 |
| 65.56 | 75.56 | 35.56 | 31.11 |
| 65.56 | 52.22 | 40.00 | 30.00 |
| 72.22 | 85.00 | 33.75 | 33.75 |
| 70.00 | 85.00 | 32.86 | 33.33 |
| 67.78 | 57.78 | 34.44 | 24.44 |
| 67.50 | 31.67 | 36.67 | 32.50 |
| 65.56 | 60.00 | 28.57 | 33.75 |
| 66.67 | 76.25 | 33.33 | 31.67 |
| 70.00 | 67.14 | 34.29 | 31.43 |
| 77.78 | 80.00 | 36.67 | 33.33 |
| 75.00 | 66.67 | 32.50 | 30.00 |
| 72.50 | 57.50 | 33.75 | 30.00 |
| 80.00 | 75.00 | 37.50 | 35.00 |
| 76.25 | 58.57 | 35.56 | 32.86 |
| 70.00 | 68.89 | 30.00 | 34.29 |
| 67.14 | 68.33 | 26.67 | 35.00 |
| 68.33 | 68.33 | 26.67 | 35.00 |
| 61.25 | 81.25 | 28.75 | 31.25 |
| 63.75 | 65.71 | 33.00 | 30.00 |
| 66.67 | 68.57 | 38.33 | 28.33 |
| 65.00 | 70.00 | 35.00 | 31.67 |
| 65.00 | 70.00 | 30.00 | 35.00 |
| 68.57 | 74.29 | 34.29 | 32.86 |
| 63.33 | 30.00 | 28.00 | 34.44 |
| 63.33 | 73.33 | 30.00 | 31.67 |
| 68.00 | 66.25 | 36.67 | 32.22 |
| 65.56 | 64.44 | 31.11 | 34.44 |
| 62.00 | 75.00 | 34.44 | 35.00 |
| 67.00 | 50.00 | 38.33 | 32.00 |
| 68.89 | 78.89 | 35.56 | 33.33 |
| 70.00 | 84.00 | 34.29 | 32.22 |
| 64.44 | 47.78 | 34.44 | 33.33 |
| 71.43 | 67.14 | 41.43 | 32.86 |
| 72.86 | 65.71 | 34.29 | 30.00 |
| 66.67 | 57.78 | 37.78 | 23.00 |
| 63.75 | 71.67 | 34.44 | 31.82 |
| 71.43 | 68.57 | 34.29 | 30.00 |
| 66.25 | 76.67 | 32.86 | 33.33 |
| 74.00 | 76.00 | 28.00 | 34.00 |
| 68.33 | 71.67 | 26.67 | 35.00 |
| 66.67 | 73.33 | 33.33 | 33.33 |

|       |       |       |       |
|-------|-------|-------|-------|
| 70.00 | 70.00 | 32.00 | 30.00 |
| 67.14 | 68.57 | 31.43 | 30.00 |
| 68.75 | 73.33 | 36.25 | 36.25 |
| 74.29 | 64.29 | 31.43 | 30.00 |
| 68.57 | 75.71 | 32.86 | 34.29 |
| 75.71 | 68.57 | 33.33 | 25.45 |
| 71.11 | 78.89 | 32.22 | 31.11 |
| 66.25 | 76.25 | 36.25 | 35.00 |
| 67.78 | 47.78 | 33.75 | 30.00 |
| 68.75 | 88.75 | 32.86 | 34.29 |
| 66.25 | 61.43 | 37.78 | 30.00 |
| 74.00 | 71.67 | 34.00 | 36.00 |
| 67.78 | 83.33 | 32.22 | 33.33 |
| 72.50 | 66.00 | 28.33 | 28.00 |
| 70.00 | 64.29 | 32.86 | 35.71 |
| 65.56 | 74.00 | 32.86 | 32.00 |
| 65.00 | 70.00 | 35.00 | 30.00 |
| 67.78 | 73.75 | 31.25 | 37.50 |
| 68.33 | 68.00 | 33.33 | 35.00 |
| 70.00 | 65.71 | 32.86 | 28.57 |
| 68.57 | 65.71 | 35.71 | 30.00 |
| 65.00 | 73.33 | 36.67 | 36.67 |
| 63.33 | 77.50 | 30.00 | 31.25 |
| 62.50 | 66.67 | 38.75 | 36.67 |
| 70.00 | 70.00 | 35.00 | 36.25 |
| 72.86 | 71.43 | 35.71 | 32.86 |
| 70.00 | 67.50 | 34.29 | 30.00 |
| 76.00 | 78.18 | 32.00 | 35.00 |
| 70.00 | 75.00 | 32.86 | 27.14 |
| 68.33 | 70.00 | 33.33 | 45.00 |
| 68.33 | 60.00 | 35.00 | 31.25 |
| 65.56 | 67.78 | 35.56 | 31.11 |
| 73.75 | 71.25 | 32.50 | 32.50 |
| 70.00 | 73.33 | 41.11 | 36.67 |
| 66.25 | 66.67 | 30.00 | 30.00 |
| 70.00 | 60.00 | 37.14 | 32.86 |
| 62.00 | 61.67 | 30.00 | 31.82 |
| 65.56 | 66.67 | 32.22 | 30.00 |
| 71.43 | 71.43 | 35.71 | 32.86 |
| 72.00 | 63.33 | 32.86 | 33.33 |
| 65.56 | 73.33 |       | 32.22 |
| 68.33 |       |       | 28.57 |



31.11

30.00

| Disease index            |             |     |              |             |     |
|--------------------------|-------------|-----|--------------|-------------|-----|
| Water                    |             |     | Landy medium |             |     |
| Mean                     | SD          | N   | Mean         | SD          | N   |
| 69.05925445              | 3.699282509 | 150 | 69.032407    | 9.197294374 | 149 |
| Carbendazim              |             |     | 1% CFB       |             |     |
| Mean                     | SD          | N   | Mean         | SD          | N   |
| 33.37433456              | 3.446011295 | 148 | 32.56518664  | 3.288527538 | 152 |
| Thousand seed weight / g |             |     |              |             |     |
| Water                    |             |     | Landy medium |             |     |
| Mean                     | SD          | N   | Mean         | SD          | N   |
| 17.43444822              | 2.925941895 | 20  | 15.74963768  | 2.301331159 | 23  |
| Carbendazim              |             |     | 1% CFB       |             |     |
| Mean                     | SD          | N   | Mean         | SD          | N   |
| 32.89346011              | 4.032248283 | 21  | 32.7754329   | 2.45349832  | 22  |
